1 **Title: Estimating Microbial Population Data from Optical Density**

2

3 **Authors:** Portia Mira<sup>1</sup>, Pamela Yeh<sup>1,2</sup>, Barry G. Hall<sup>3</sup>

4

5 **Institutional Affiliation:**

6 <sup>1</sup>Department of Ecology and Evolutionary Biology, University of California, Los Angeles, U.S.A.

7 <sup>2</sup>Santa Fe Institute, Santa Fe, New Mexico, U.S.A.

8 <sup>3</sup>Bellingham Research Institute, Portland, OR, USA

9

10 **Corresponding Author:**

11 Email: portiamira20@gmail.com

12 **Abstract**

13 The spectrophotometer has been used for decades to measure the density of bacterial populations  
14 as the turbidity expressed as optical density – OD. However, the OD alone is an unreliable metric  
15 and is only proportionately accurate to cell titers to about an OD of 0.1. The relationship between  
16 OD and cell titer depends on the configuration of the spectrophotometer, the length of the light  
17 path through the culture, the size of the bacterial cells, and the cell culture density. We  
18 demonstrate the importance of plate reader calibration to identify the exact relationship between  
19 OD and cells/ml. We use four bacterial genera and two sizes of micro-titer plates (96-well and  
20 384-well) and show that the cell/ml per unit OD depends heavily on the bacterial cell size and  
21 plate size. We applied our calibration curve to real growth curve data and conclude the cells/ml –  
22 rather than OD – is a metric that can be used to directly compare results across experiments, labs,  
23 instruments, and species.

## 24 **Introduction**

25 The Beer-Lambert law (1) relates the molar concentration (C) of a solute to absorbance of light  
26 according to the equation  $C = \epsilon A$  where  $\epsilon$  is the molar extinction coefficient and A is the  
27 absorbance. Epsilon ( $\epsilon$ ) is given at a specific wavelength and specific light path, usually a 1 cm  
28 light path. That relationship is what allows us to monitor enzyme reactions by absorbance, to  
29 measure protein concentrations by absorbance, and to do enzyme-linked immunoassays (ELISA).

30  
31 The Beer-Lambert law, however, applies only to solutions in which molecules of solute are  
32 uniformly distributed throughout the solvent. It does not apply to suspensions of particulate  
33 matter such as microbial cells. Rather than absorbing light, particles scatter light, which is why  
34 we express turbidity as OD (optical density) instead of A (absorbance). The relationship  
35 between cells/ml and OD is a complex one and depends on several factors including length of  
36 light path, size of the particles (cells), and number of particles. There is no simple factor  
37 equivalent to  $\epsilon$  that relate number of cells/ml to OD.

38  
39 It is not a trivial matter to determine the number of cells/ml or the mass of cells in a culture. The  
40 classic way was to dry a culture and weigh the cells, a method that does not lend itself to easy  
41 measurement of cell densities in small cultures, (to say nothing of the fact that while weighing  
42 the dehydrated cells, they absorb moisture from the air and the weight increases even as the  
43 balance is watched!). It can be important to determine cell densities easily and quickly, i.e.,  
44 when monitoring growth in fermenters to determine when to harvest cells.

45  
46 The convenience of measuring cell populations in microtiter plate readers led us to determine the  
47 relationship between OD and cells/ml for several microbial species and for plates of different  
48 sizes. Given that relationship OD can be used to calculate cell numbers just as A is used to  
49 calculate concentration of a solute.

50  
51 Spectrophotometers have been used for over 6 decades as a means of measuring the population  
52 density of microbial cultures (2-4). Population density is estimated from the turbidity of the  
53 culture and is typically expressed as OD (optical density), typically at a wavelength of 600 nm.  
54 OD is the negative log of transmittance, which is the fraction of the light that is detected when it  
55 is passed through a cuvette that contains a sample of the culture. The Beer-Lambert law states  
56 that OD is proportional to the concentration of a solution (1). However, this law does not apply  
57 to suspensions of particles (or bacterial cultures) because instead of absorbing light, light is  
58 scattered off the axis of the detector (5, 6). As a result, the OD is proportional to the cell titer  
59 only up to a limited point, typically an OD of about 0.1 (Figure 3). Above that range, some of  
60 the light that is scattered away from the detector by one cell is subsequently scattered back to the  
61 detector by another cell (7). As a result, the OD does not increase as fast as does the cell titer  
62 and therefore, one cannot rely on OD alone to accurately measure bacterial population densities.

63  
64 To precisely estimate cell titers from observed OD measurements, it is necessary to calibrate the  
65 spectrophotometer. The relationship of OD to cell titer depends on four components: 1) the  
66 configuration of the spectrophotometer, 2) the length of the light path through the suspension, 3)  
67 the size of the cells, and 4) the cell culture density. Therefore, it is necessary to calibrate each  
68 spectrophotometer model separately for each microbial species that is to be studied.

69

70 Until about a decade ago ODs were determined by putting a sample of the culture into a cuvette  
71 of, typically, a 1 cm light path. Determining the growth rate required sampling from a culture at  
72 timed intervals and recording the OD at each time point. In practical terms it was difficult to  
73 follow more than about 20 cultures simultaneously. The advent of using a microtiter plate reader  
74 to monitor the growth of cultures in the wells of a microtiter plate permits high throughput  
75 measurements of microbial growth kinetics. However, the same considerations of calibration  
76 apply to microtiter plate readers as to spectrophotometers (7). Microtiter plates have various  
77 sizes (i.e., 96-wells, 384-wells) which means each well has different depths. Therefore, it is  
78 necessary to calibrate a plate reader separately for each size plate.

79  
80 A recent study shows the benefit of plate reader calibrations using silica microspheres (8).  
81 However, they focus their study on only *E. coli* and do not consider microtiter plate size, well-  
82 depth, or other sizes of bacterial species. Here, we demonstrate the importance of calibrating a  
83 plate reader using a Biotek Epoch 2 plate reader, both 96-well and 384-well microtiter plates and  
84 four bacterial species that span a wide range of cell sizes. We then apply the calibration to a set  
85 of growth curves for *Escherichia coli* and show that using cells/ml yields the same growth rates  
86 as using OD.

## 87 88 **Results**

### 89 Calibration curves

90 Standing overnight cultures for each organism (*E. coli* DH5 $\alpha$ , *S. epidermidis*, *B. megaterium*  
91 and *P. putida*) were concentrated to about  $2.5 \times 10^9$  cells/ml in mineral salts (M9) buffer, 2x  
92 serially diluted. Each dilution, plus a buffer blank, was distributed to four wells (96 well plate) or  
93 6 wells (384 well plate) and the ODs were measured. For each dilution, the mean OD was  
94 corrected by subtracting the mean OD of the blank (buffer) well, and corrected ODs were  
95 graphed vs the number of viable cells. Stevenson et al (7) suggested that a quadratic relationship  
96 exists between cell number and OD. However, to identify the best possible fit, we wanted to  
97 explore other relationships. We fit curves to the resulting points based on assumption of four  
98 relations- a linear relationship, a quadratic relationship, a cubic relationship, and a polynomial of  
99 degree 4 relationship. *E. coli* fits are shown as representative data (Figure 1) and the  
100 corresponding R<sup>2</sup> values, the correlation coefficients of the fits, for the other genera measured are  
101 also shown in Table 1.

102  
103 The linear fit is clearly inappropriate, with R<sup>2</sup> = 0.95 for both 96 and 384 well plates. To choose  
104 among the other fits, we considered R<sup>2</sup> as a measure (Table 1). We found that the R<sup>2</sup> criterion for  
105 the polynomial of degree 4 fit is the best for *E. coli*.

106  
107 We similarly calibrated the plate reader with *Staphylococcus epidermidis*, *Pseudomonas putida*,  
108 and *Bacillus megaterium*. In each case the polynomial of degree 4 was the best fit. The  
109 approximate cells/ml with the polynomial of degree 4 using the general equation: A OD<sup>4</sup> + B  
110 OD<sup>3</sup> + C OD<sup>2</sup> + D OD + E where A, B, C, D and E are the coefficients of the terms. Table 2  
111 shows the polynomial degree 4 equations for each organism and plate size. We also considered  
112 another criterion for goodness of fit, Root Square Mean Error (RMSE) (data not shown). The  
113 smaller is RMSE the better is the fit. By RMSE criterion, polynomial degree 4 was also  
114 consistently the best fit.

115

116 The equations are different for each species, and within a species for 96 and 384 well plates  
117 (Table 2). This emphasizes the need to calibrate each species and plate size separately. We  
118 provide these equations solely as examples, and we emphasize that they should not be used for  
119 instruments other than the Biotek Epoch 2.

120  
121 The Cells/ml @ OD = 1 decreases as CV (cell volume) increases according to a quadratic  
122 function in which Cells/ml @ OD = 1 is  $2.1 \text{ e}8 \times \text{CV}^2 - 5.9 \text{ e}9 \times \text{CV} + 4.0 \text{ e}10$ , with  $R^2 = 0.998$   
123 for 96-well plates and  $1.2 \text{ e}8 \times \text{CV}^2 - 3.4 \text{ e}9 \times \text{CV} + 2.3 \text{ e}10$ , with  $R^2 = 0.999$  for 384-well plates.  
124 This is consistent with Koch's 1961 and Stevenson et al's 2016 finding (2, 7).

125  
126 Application of calibration curve to real growth curve data

127 The growth of two *E. coli* strains and one *S. epidermidis* strain at 37° in LBD medium was  
128 monitored. Population density was measured as corrected OD and cells/ml based on a quadratic-  
129 fit calibration curve. Figure 2 shows a plot of one well for *S. epidermidis* strain and highlights  
130 that the curves based on OD and cells/ml are almost identical. For the *S. epidermidis* culture in  
131 Figure 2, the growth rate based on OD was  $\mu = 0.01459 \pm 0.000412 \text{ min}^{-1}$  based on 6 points from  
132 140 through 240 minutes, with  $R = 0.9984$ . Based on cells/ml, the growth rate was similar,  
133  $\mu = 0.01354 \pm 0.000285 \text{ min}^{-1}$  based on 6 points from 140 through 240 minutes, with  $R = 0.9983$ .

134  
135 Figure 3 shows a growth curve of *E. coli* based on OD and the same curve based on scaled  
136 cells/ml. Above an OD of 0.1 the OD (open circles) is significantly below the scaled cells/ml,  
137 illustrating that the proportionality of cells/ml to OD falls off above OD = 0.1.

138  
139 The program GrowthRates (9) version 5.1 (<https://bellinghamresearch.com/>) was used to  
140 estimate the growth rates in 12 wells for *E. coli*K12 strain DH5, the uropathogenic *E. coli* strain  
141 CFT073 (10), and *S. epidermidis* strain. ATCC 12228 (11). We found the growth rate estimates  
142 similar when comparing corrected OD to cell/ml using the polynomial degree 4 fit. The growth  
143 rate estimated from cells/ml was significantly different from the growth rate based on OD for *E.*  
144 *coli* CFT073 and *S. epidermidis* (Table 3).

145  
146 The growth rates estimated from OD and from cells/ml are not the same. Which estimates  
147 should we trust more? We trust the rates based on cells/ml because at ODs above 0.1 the OD  
148 readings fall off as the true population density (cells/ml) increases.

149  
150 **Discussion**

151  
152 Our work highlights the importance of calibrating a microplate reader. We use four different  
153 bacterial genera to explore the relationships between corrected OD and cells/ml. First, we  
154 compared a quadratic, cubic and polynomial degree 4 fit to bacterial growth data and show that  
155 for all four genera, the best calibration fit is a polynomial of degree 4 (Table 1). To highlight the  
156 importance of calibrating the plate reader separately for 96-well and 384-well plates, we show  
157 the differences in the polynomial degree 4 equations. This difference likely arises from the  
158 different culture depths, hence different light path lengths, in 96- vs 384- well plates (Table 2).  
159 We also emphasize the importance of separate calibrations for each genus (Table 2). The  
160 calibration coefficients depend upon the cell volume, with the sum of those coefficient  
161 decreasing as a cubic function as the microbial cell volume increases. Good calibration and

162 application of the calibration curve clearly depends upon consistent well volumes, not only  
163 within a single experiment, but between experiments.

164  
165 Growth rates estimated from OD and cells/ml are not identical (Table 3), but we trust the rates  
166 estimated from cells/ml more than those estimated from OD.

167  
168 Why is it worth the effort to calibrate a plate reader? First, because it allows us to express the  
169 maximum population density, i.e., the carrying capacity of the medium, in terms of cells/ml  
170 rather than OD. Consider the maximum OD for *E. coli* CFT073 and *S. epidermidis* in 96 well  
171 plates (Table 3). These values are very similar (0.622 and 0.610 respectively), but for *E. coli*, the  
172 OD of 0.622 represents only  $8.2 \times 10^8$  cells/ml. On the other hand, the OD of 0.610 for *S.*  
173 *epidermidis* represents  $1.25 \times 10^{10}$  cells/ml. This is a fifteen-fold difference in the number of  
174 cells per milliliter in each overnight culture. This difference is important to consider when  
175 performing experiments that depend on the number of cellular divisions or cells present, such as  
176 cellular communication (12, 13) and antibiotic susceptibility (14-17) and biofilms (18).

177  
178 Knowing the relationship between OD and cells/ml is not just valuable during growth rate  
179 determinations. For instance, when monitoring the growth yield in a fermenter it is very  
180 valuable to know the actual population density to decide when to harvest the cells. For *S.*  
181 *epidermidis* if the yield according to OD is OD = 2.5 that is five times the yield when OD = 0.5.  
182 The cells/ml at OD = 2.5 is  $1.2 \times 10^{12}$ , which is 125 times the yield when OD = 0.5 ( $9.5 \times 10^9$   
183 cells/ml).

184  
185 Probably the most important reason to calibrate plate readers is to use a consistent metric for  
186 expressing population densities. By expressing population densities in cells/ml, rather than OD,  
187 experiments can be directly compared from different instruments, different labs, and even  
188 different genera. Our work shows that using cells/ml as a metric permits reliable measurements  
189 of growth rates as does using OD (Table 3) because cell/ml allows consistency when expressing  
190 population densities. To measure bacterial growth rates more precisely, we encourage all to  
191 calibrate their instruments and to express their results in cells/ml.

192

## 193 **Methods**

### 194 **Bacterial Strains**

195 We used four bacterial strains of different genera: *Escherichia coli* K12 strain DH5 $\alpha$  (F-  
196  $\phi$ 80lacZ $\Delta$  M15  $\Delta$  (*lacZYA-argF*) U169 *recA1 endA1 hsdR17* (rK- mK+) *phoA supE44*  $\lambda$ - *thi-1*  
197 *gyrA96 relA1*) from ThermoFisher, *Escherichia coli* strain CFT073 O6:K2:H1 (10),  
198 *Pseudomonas putida* strain ATCC 12633, *Staphylococcus epidermidis* strain ATC12228 (11)  
199 and *Bacillus megaterium* strain ATCC 14581.

200

### 201 **Plate Reader Calibration**

202 To identify the colony forming units per genus, we inoculated four standing overnight cultures  
203 for each genus. Cultures were inoculated at 37°C in 10mL of LB (10 g tryptone, 5 g yeast extract,  
204 10 g NaCl per liter) and placed in 15mL culture tubes with tightly sealed caps that allowed no  
205 aeration for 16-18 hours. Cultures of each genus were combined into a 50-mL conical tube and  
206 spun down at 4,000 rpm for 15 minutes at 4 °C then resuspended in 4mL M9 buffer, this led to a  
207 4X concentrated starting bacterial culture. Two sets of fifteen dilutions were made. The first,

208 starting cultures were diluted at concentrations that gave the most countable number of colonies.  
209 These were  $10^6$ ,  $10^7$ ,  $10^8$  for *E. coli*, and  $10^4$  and  $10^5$  for *S. epidermidis*, *P. putida*, and *B.*  
210 *megaterium*. Dilutions were plated on LB agar, inoculated at 37 °C overnight and counted the  
211 following day. The second set of dilutions were 15 two-fold dilutions from the starting culture.  
212 Each tube was plated in 96-well plates (4 replicates 200 µl per well) and 384-well (6 replicates,  
213 80µl per well) plus blank wells (only M9) for each plate size. The OD<sub>600</sub> was measured every 5  
214 minutes for 30 minutes using the Biotech Epoch 2 plate reader. We report the corrected OD, that  
215 is the OD of only media subtracted from each experimental reading. Aggregated data was used in  
216 combination with the colony counts to obtain the individual calibration for each genus.

217  
218 Please see supplementary materials file "Plate Reader Calibration Protocol.pdf" for detailed step-  
219 by-step protocol, and the file "Calibration calculator.xlsx" which facilitates using that protocol.

220

### 221 **Growth Rate Experiments**

222 Standing overnight cultures of *E. coli* and *S. epidermidis* were diluted (1:20) to obtain a starting  
223 OD of 0.02 – 0.03. Cultures were then plated across the row of a 96-well plate (12 replicate wells)  
224 and the OD<sub>600</sub> was measured every 20 minutes for 22 hours. The growth rates were calculated  
225 from the OD measurements using the program GrowthRates (9) version 5.1  
226 (<https://bellinghamresearch.com/>).

227

### 228 Acknowledgements:

229 We are grateful for funding from a KL2 Fellowship (PJY) through the NIH/National Center for  
230 Advancing Translational Science (NCATS) UCLA CTSI Grant Number UL1TR001881 as well  
231 as the Presidential Postdoctoral Fellowship to Dr. Portia Mira.

232 **Figures:**

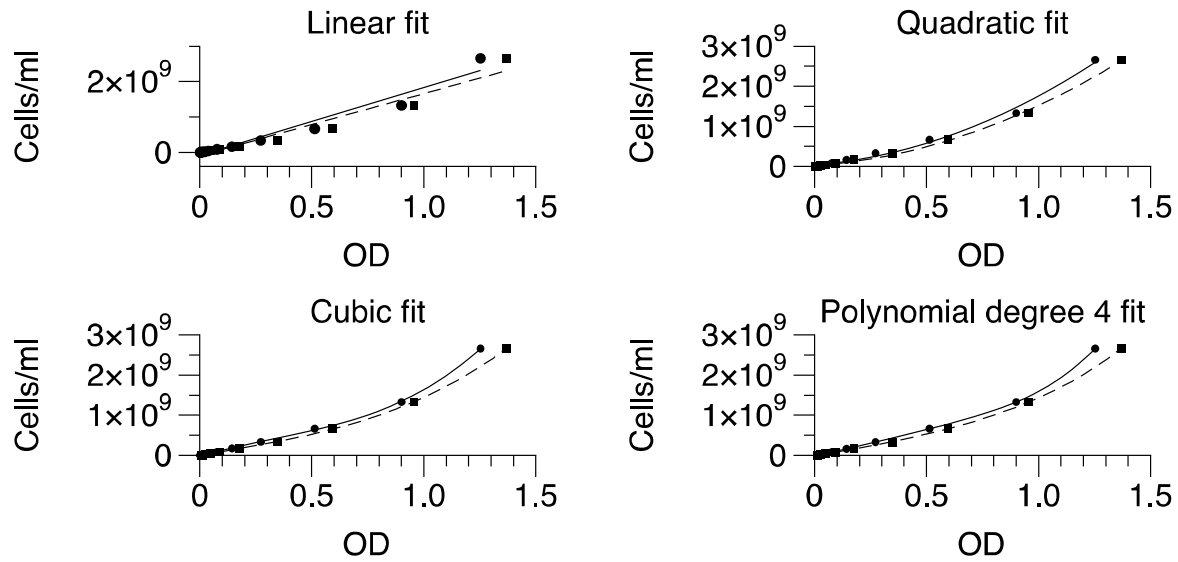

233  
234  
235  
236  
237  
238  
239

Figure 1: Relationship between cells/ml and OD with different fits. The solid lines and round points represent 96-well measurements, and the dashed lines and square points represent 384-well measurements for *E. coli*.

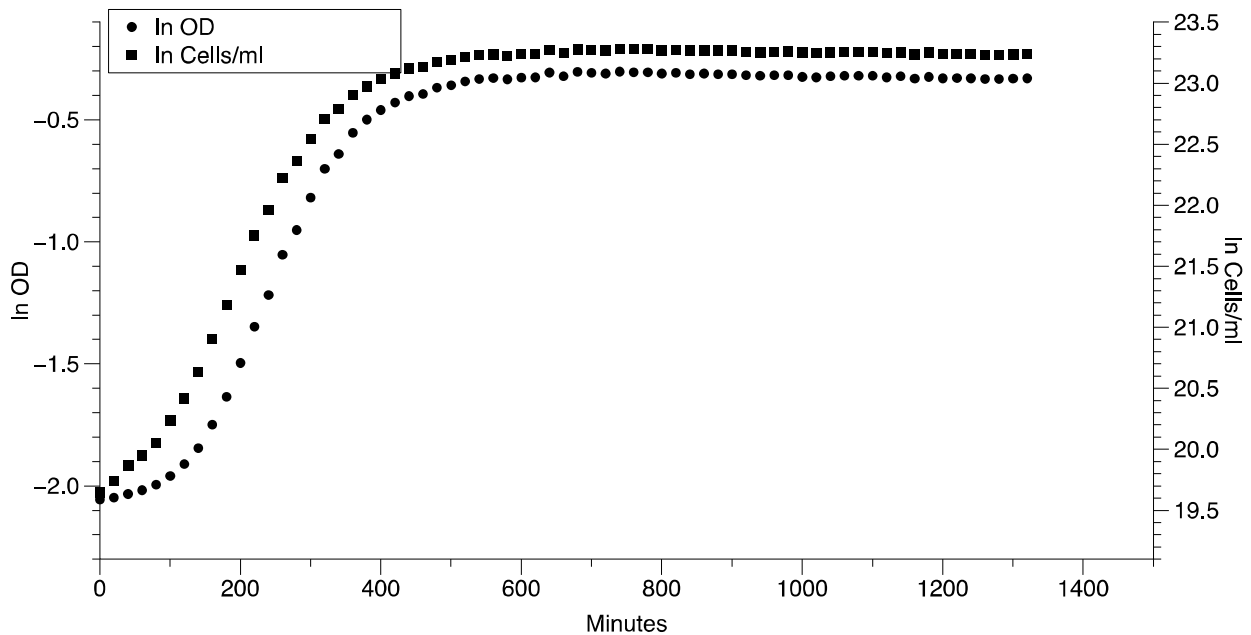

240  
241  
242  
243  
244

Figure 2. Growth curves of *S. epidermidis* in one well based on different measures of population density. The natural log of OD (circles) and cells per mL (squares) is plotted over time (minutes).



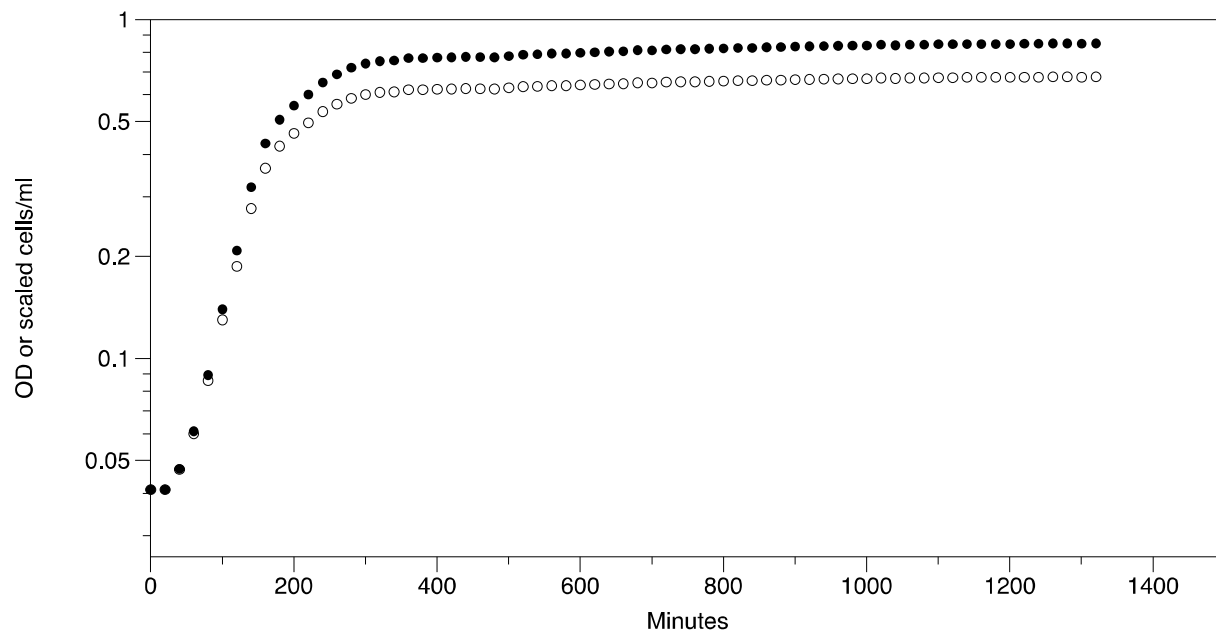

245  
246  
247  
248  
249

Figure 3. Growth curves based on OD (open circles) and based on scaled cells/ml (closed circles). Cells/ml have been scaled to fit on the same scale as OD by dividing cells/ml by  $1.07 \times 10^9$ .

250 **Tables:**

251

252 Table 1: R<sup>2</sup> values for the different fits for each of the four bacterial genera measured.

| Organism              | 96 well   |         |            | 384 well  |         |            |
|-----------------------|-----------|---------|------------|-----------|---------|------------|
|                       | Quadratic | Cubic   | Polynomial | Quadratic | Cubic   | Polynomial |
| <i>S. epidermidis</i> | 0.9987    | 0.99995 | 1.0        | 0.99989   | 0.99995 | 0.99999    |
| <i>E. coli</i>        | 0.99452   | 0.99961 | 1.0        | 0.99815   | 0.99995 | 1.0        |
| <i>P. putida</i>      | 0.99824   | 0.99996 | 0.99996    | 0.99821   | 0.99987 | 0.99992    |
| <i>B. megaterium</i>  | 0.99977   | 0.99999 | 1.0        | 0.99882   | 0.99936 | 0.99997    |

253 Organisms are listed in order of cell volume.

254

255

256

257 Table 2: Calibration equations and cell size

| Species               | Plate Size | Polynomial Degree 4 Equation, Cells/ml =                       | Cells/ml @ OD = 1     | Cell Vol     |
|-----------------------|------------|----------------------------------------------------------------|-----------------------|--------------|
| <i>S. epidermidis</i> | 96         | $4.3e10 OD^4 - 3.8e10 OD^3 + 1.2e10 OD^2 + 1.7e10 OD + 1.7e8$  | $3.42 \times 10^{10}$ | $1 \mu^3$    |
|                       | 384        | $-2.5e10 OD^4 + 4.2e10 OD^3 - 1.2e10 OD^2 + 1.5e10 OD + 9.4e7$ | $2.01 \times 10^{10}$ |              |
| <i>E. coli</i>        | 96         | $1.6e9 OD^4 - 2.3e9 OD^3 + 1.3e9 OD^2 + 1.0e9 OD + 5.1e5$      | $1.6 \times 10^9$     | $9.8 \mu^3$  |
|                       | 384        | $3.3e8 OD^4 - 2.1e8 OD^3 + 4.9e8 OD^2 + 8.3e8 OD + 4.2e4$      | $1.44 \times 10^9$    |              |
| <i>P. putida</i>      | 96         | $2.4e8 OD^4 - 2.7e8 OD^3 + 6.4e7 OD^2 + 4.7e8 OD + 1.4e5$      | $5.04 \times 10^8$    | $12.3 \mu^3$ |
|                       | 384        | $3.7e8 OD^4 - 6.8e8 OD^3 + 3.8e8 OD^2 + 3.7e8 OD + 8.2e5$      | $4.41 \times 10^8$    |              |
| <i>B. megaterium</i>  | 96         | $4.4e8 OD^4 - 4.9e8 OD^3 + 3.2e8 OD^2 + 5.9e8 OD + 4.3e6$      | $8.64 \times 10^8$    | $17 \mu^3$   |
|                       | 384        | $-1.2e9 OD^4 + 3.6e9 OD^3 - 2.7e9 OD^2 + 1.2e9 OD - 5.3e6$     | $8.95 \times 10^8$    |              |

258

259

260

261 Table 3: Comparison of growth rates based on OD and cells/ml.

| <i>E. coli</i> K12 DH5 $\alpha$ |        |        |                    | <i>E. coli</i> CFT073 |        |                    | <i>S. epidermidis</i> ATCC 12228 |        |                       |
|---------------------------------|--------|--------|--------------------|-----------------------|--------|--------------------|----------------------------------|--------|-----------------------|
|                                 | $\mu$  | R      | max OD or cells/ml | $\mu$                 | R      | max OD or cells/ml | $\mu$                            | R      | max OD or cells/ml    |
| OD                              | 0.0212 | 0.9968 | 0.348              | 0.0235                | 0.9989 | 0.622              | 0.0155                           | 0.9989 | 0.610                 |
| cells/ml                        | 0.0207 | 0.9984 | $4.36 \times 10^8$ | 0.0253                | 0.9990 | $8.21 \times 10^8$ | 0.0139                           | 0.9986 | $1.25 \times 10^{10}$ |
| p-value                         | 0.55   |        |                    | 0.0024                |        |                    | 9.19e-6                          |        |                       |

262 Values are means of 12 replicates. In all cases the S.E. was < 0.05 of the mean.

263

264

265

266  
267  
268  
269  
270  
271  
272  
273  
274  
275  
276  
277  
278  
279  
280  
281  
282  
283  
284  
285  
286  
287  
288  
289  
290  
291  
292  
293  
294  
295  
296  
297  
298  
299  
300  
301  
302  
303  
304  
305  
306

## References

1. Swinehart DF. The beer-lambert law. *Journal of chemical education*. 1964;39.7:333.
2. Koch A. Some calculations on the turbidity of mitochondria and bacteria. *Biochemica et Biophysica Acta*. 1961;51:429-41.
3. Ur A, Brown DF. Impedance monitoring of bacterial activity. *J Med Microbiol*. 1975;8(1):19-28.
4. Koch AL. Turbidity measurements of bacterial cultures in some available commercial instruments. *Anal Biochem*. 1970;38(1):252-9.
5. Zaccanti G, Del Bianco S, Martelli F. Measurements of optical properties of high-density media. *Appl Opt*. 2003;42:4023-39.
6. Koch AL, Ehrenfeld E. Th size and shape of bacteria by light scattering measurements. *Biochim Biophys Acta*. 1968;165(2):262-73.
7. Stevenson K, McVey AF, Clark IBN, Swain PS, Pilizota T. General calibration of microbial growth in microplate readers. *Sci Rep*. 2016;6:38828.
8. Beal J, Farny NG, Haddock-Angelli T, Selvarajah V, Baldwin GS, Buckley-Taylor R, et al. Author Correction: Robust estimation of bacterial cell count from optical density. *Commun Biol*. 2020;3(1):640.
9. Hall BG, Acar H, Nandipati A, Barlow M. Growth rates made easy. *Molecular biology and evolution*. 2014;31(1):232-8.
10. Welch RA, Burland V, Plunkett G, 3rd, Redford P, Roesch P, Rasko D, et al. Extensive mosaic structure revealed by the complete genome sequence of uropathogenic *Escherichia coli*. *Proc Natl Acad Sci U S A*. 2002;99(26):17020-4.
11. Zhang YQ, Ren SX, Li HL, Wang YX, Fu G, Yang J, et al. Genome-based analysis of virulence genes in a non-biofilm-forming *Staphylococcus epidermidis* strain (ATCC 12228). *Mol Microbiol*. 2003;49(6):1577-93.
12. Bassler BL. Small talk. Cell-to-cell communication in bacteria. *Cell*. 2002;109(4):421-4.
13. Salmond GP, Bycroft BW, Stewart GS, Williams P. The bacterial 'enigma': cracking the code of cell-cell communication. *Mol Microbiol*. 1995;16(4):615-24.
14. Andrews JM. Determination of minimum inhibitory concentrations. *J Antimicrob Chemother*. 2001;48:5-16.
15. Bollenbach T, Quan S, Chait R, Kishony R. Nonoptimal microbial response to antibiotics underlies suppressive drug interactions. *Cell*. 2009;139(4):707-18.
16. Mira P, Barlow M, Meza JC, Hall BG. Statistical Package for Growth Rates Made Easy. *Molecular biology and evolution*. 2017;34(12):3303-9.
17. Seigal A, Mira P, Sturmfels B, Barlow M. Does Antibiotic Resistance Evolve in Hospitals? *Bull Math Biol*. 2017;79(1):191-208.
18. Kirby AE, Garner K, Levin BR. The relative contributions of physical structure and cell density to the antibiotic susceptibility of bacteria in biofilms. *Antimicrob Agents Chemother*. 2012;56(6):2967-75.
